# Supplementary material for: Effects of a popular exercise and weight loss program on weight loss, body composition, energy expenditure and health in obese women
Source: Springer Nature journal article supplement (doi:10.1186/1743-7075-6-23), 2009-05-14

Delta Waist Circumference (cm)

30  
20  
10  
0  
-10  
-20  
-30  
-40

HED

ND

VLCHP

LCMP

HCLP

CON

a

a

a

a

a

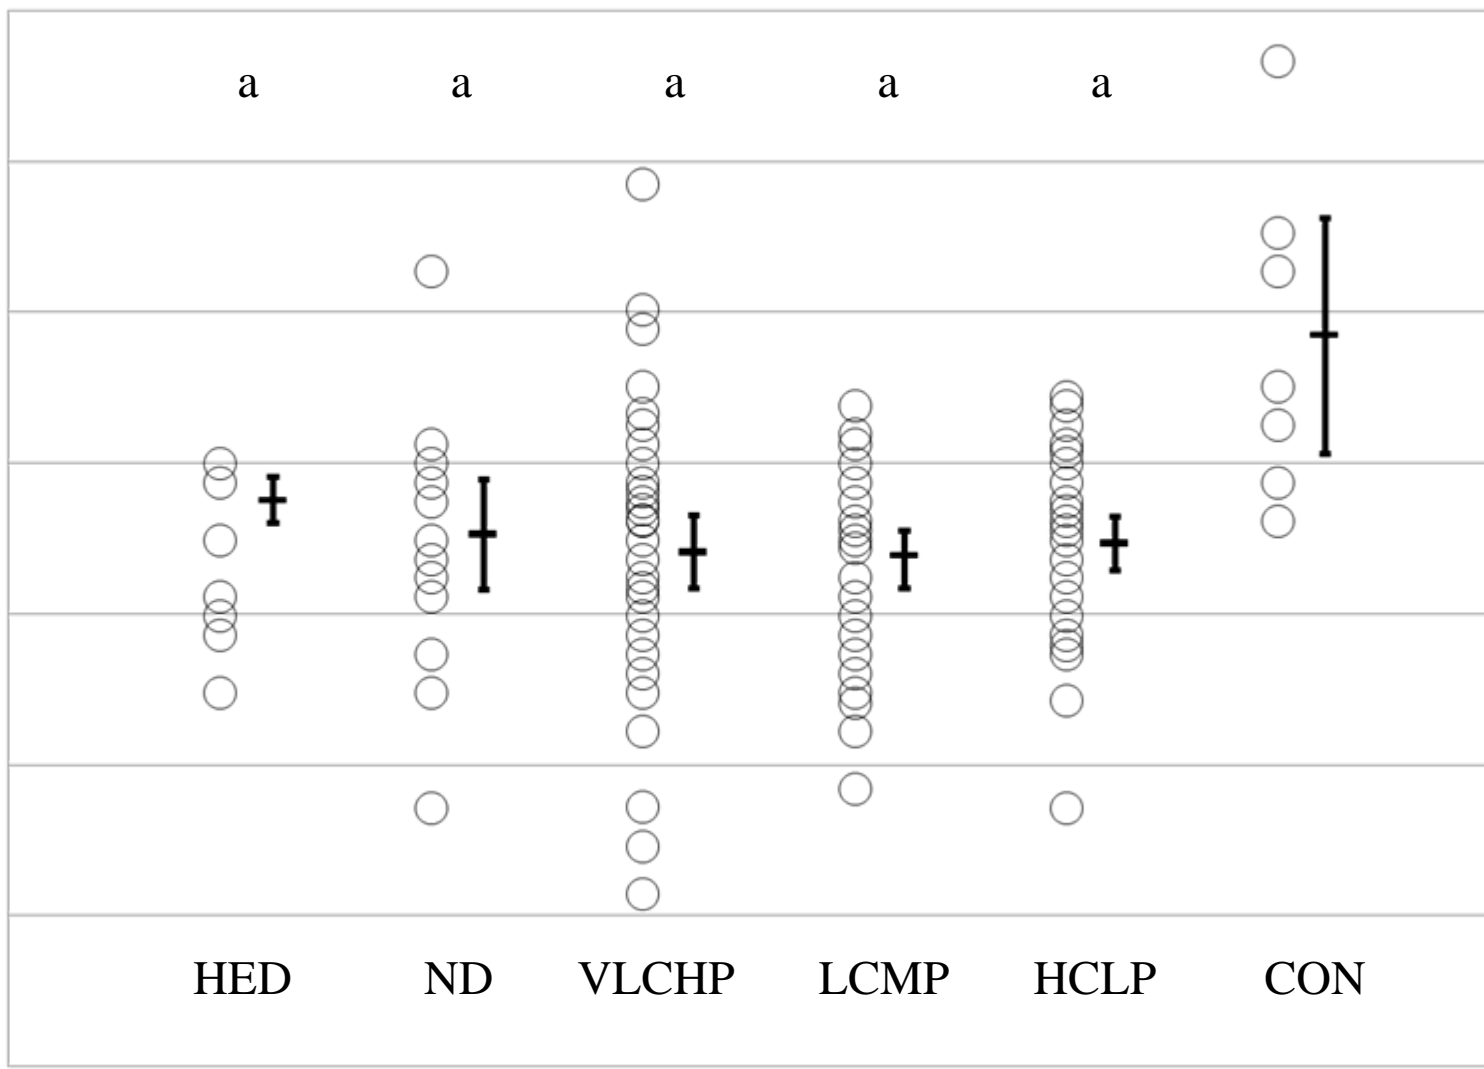

Supplement: 12986_2008_183_MOESM2_ESM.pdf [file 12986_2008_183_MOESM2_ESM.pdf]
